# Supplementary material
Source: PubMed Central journal article supplement (PMC3416066)
Supplement: EC.00017-12_zek999093941so1.pdf [file EC.00017-12_zek999093941so1.pdf]

**A**

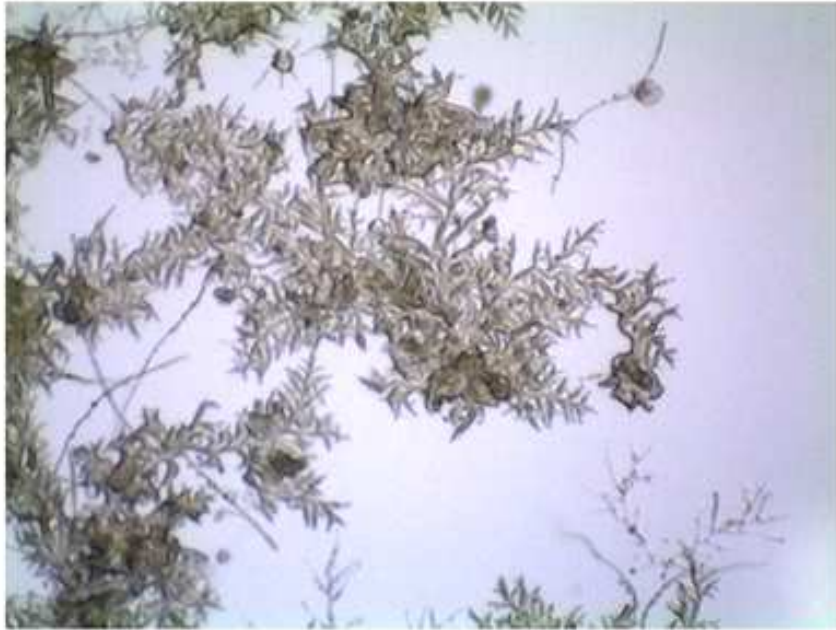

500 $\mu$ m

**B**

Suppl. Fig. 1

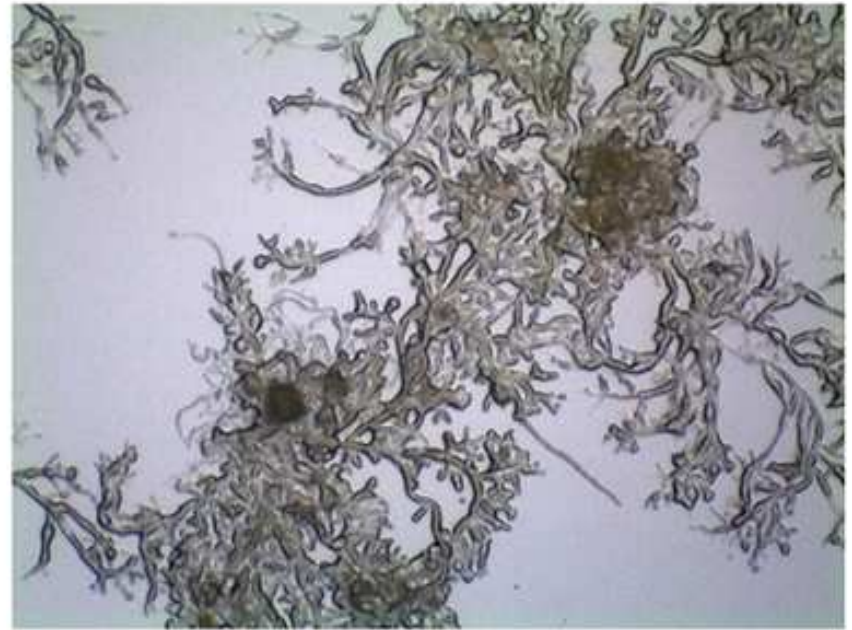

Suppl. Fig.2

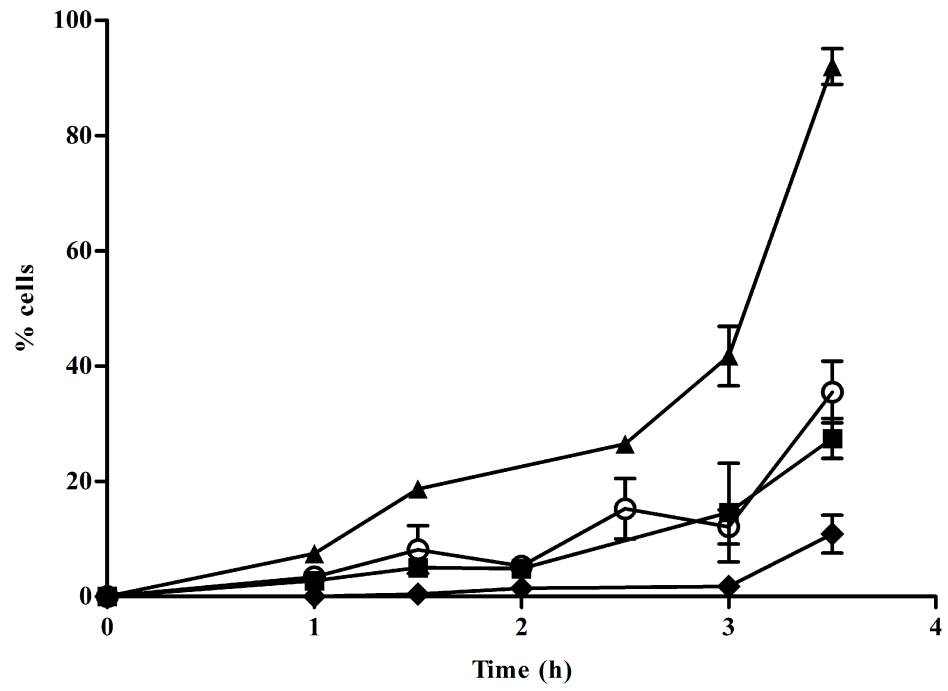

A

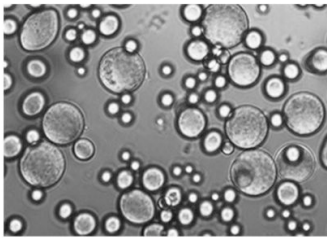

B

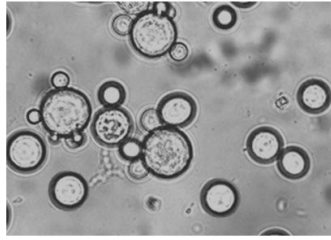

C

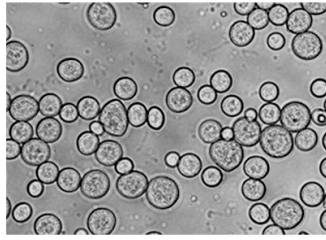

D

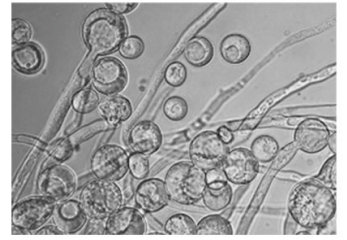

30  $\mu$ m

Supp. Fig.3

|                                                      | <b>PKAR1</b>                        | <b>PKAR2</b>                        | <b>PKAR3</b>            | <b>PKAR4</b>                                                       |
|------------------------------------------------------|-------------------------------------|-------------------------------------|-------------------------|--------------------------------------------------------------------|
| Viability                                            | None                                | None                                | None                    | Essential                                                          |
| PKAC total activity                                  | Decreased in $\Delta$ PKAR1         | Similar in $\Delta$ PKAR2           | N. D. <sup>1</sup>      | N. D.                                                              |
| Effect on ratio of PKAC activity -/+ cAMP            | Lower in $\Delta$ PKAR1             | Similar in $\Delta$ PKAR2           | N. D.                   | N. D.                                                              |
| Expression                                           | High in aerobiosis and anaerobiosis | High in aerobiosis and anaerobiosis | High in spores          | High after germ tube emission and in anaerobiosis-aerobiosis shift |
| Radial growth                                        | Major positive function             | None                                | Minor positive function | Major positive function                                            |
| Sporulation                                          | Major positive function             | None                                | Minor positive function | Major positive function                                            |
| Hypha morphology (solid medium)                      | None                                | None                                | None                    | Essential                                                          |
| Germination                                          | Delays                              | Delays                              | None                    | Essential                                                          |
| Cell mother Volume                                   | Increases                           | Increases                           | None                    | Decreases                                                          |
| Hyphal length                                        | Increases                           | Decreases                           | None                    | N. D.                                                              |
| Growth in anaerobiosis and Glycine (Nitrogen source) | None                                | Unipolar growth                     | None                    | N. D.                                                              |
| Polyubiquitilation                                   | Yes                                 | Yes                                 | No                      | No                                                                 |

### Summary Table

Summary of the conclusions on the distinct roles of the four PKAR isoforms including PKR1 which was previously characterized by our group (\*)

(\*) **Ocampo J, Fernandez Nuñez L, Silva F, Pereyra E, Moreno S, Garre V, Rossi S.**

2009. A subunit of protein kinase A regulates growth and differentiation in the fungus

*Mucor circinelloides*. Eukaryot. Cell **8**: 933-944.

### **Suppl. Fig. 1. Hyphal cell polarity**

Image of hyphae from growing edges of the colonies of (A) R7B strain and (B)  $\Delta R4$  heterokaryotic strain grown in solid medium MMC pH 4.5 for three days at 30°C.

### **Suppl. Fig. 2. Germination kinetics of the *pkaR* mutant strains**

The germination kinetics of R7B wild type strain (o), and the mutant strains,  $\Delta R2$  ( $\blacktriangle$ ),  $\Delta R3$  ( $\blacksquare$ ) and  $\Delta R4$  ( $\blacklozenge$ ) was determined by microscopic observation of the germinated cells at different time points during four hours of aerobic growth in YPG medium pH 4.5. Data are the mean +/- SEM for three independent experiments.

### **Suppl. Fig. 3. Anaerobic growth and nitrogen source**

The wild type strain R7B and mutant strain  $\Delta R2$  grown under anaerobic condition at 30°C over night. (A) R7B (B)  $\Delta R2$  in the presence of glucose as carbon source and casaminoacids as nitrogen source. (C) R7B and (D)  $\Delta R2$  grown in the presence of glucose as carbon source and glycine as nitrogen source.
